# Supplementary material
Source: publisher figshare collection journal article supplement (https://acs.figshare.com/ndownloader/files/7224032)
Supplement: Supplementary file 1 [file 7224032]

#=======================================================================
data_global
#======================================================================= 
_publ_contact_author_name                'Mercouri G. Kanatzidis'
_publ_contact_author_address
;
   Department of Chemistry
     2145 Sheridan Road
   Northwestern University
   Evanston, IL 60208-3113
           USA
;
_publ_contact_author_email               m-kanatzidis@northwestern.edu
_publ_contact_author_fax                 '847-491-5937'
_publ_contact_author_phone               '847-467-1541'
#=======================================================================
data_3a.GASnI3-100K
#=======================================================================
_audit_creation_method            SHELXL-97
_chemical_name_systematic 
; 
 ? 
; 
_chemical_name_common             'Guanidinium Tin Iodide'
_chemical_melting_point           ? 
_chemical_formula_moiety          'C(NH2)3SnI3'
_chemical_formula_sum 
 'C H6 I3 N3 Sn' 
_chemical_formula_weight          559.48 
 
loop_ 
 _atom_type_symbol 
 _atom_type_description 
 _atom_type_scat_dispersion_real 
 _atom_type_scat_dispersion_imag 
 _atom_type_scat_source 
 'C'  'C'   0.0033   0.0016 
 'International Tables Vol C Tables 4.2.6.8 and 6.1.1.4' 
 'H'  'H'   0.0000   0.0000 
 'International Tables Vol C Tables 4.2.6.8 and 6.1.1.4' 
 'N'  'N'   0.0061   0.0033 
 'International Tables Vol C Tables 4.2.6.8 and 6.1.1.4' 
 'Sn'  'Sn'  -0.6537   1.4246 
 'International Tables Vol C Tables 4.2.6.8 and 6.1.1.4' 
 'I'  'I'  -0.4742   1.8119 
 'International Tables Vol C Tables 4.2.6.8 and 6.1.1.4' 
 
_symmetry_cell_setting           monoclinic
_symmetry_space_group_name_H-M   'P 21/c'
_symmetry_space_group_name_Hall  '-P 2ybc'
_symmetry_Int_Tables_number      14 
 
loop_ 
 _symmetry_equiv_pos_as_xyz 
 'x, y, z' 
 '-x, y+1/2, -z+1/2' 
 '-x, -y, -z' 
 'x, -y-1/2, z-1/2' 
 
_cell_length_a                    9.3044(4) 
_cell_length_b                    21.1918(10) 
_cell_length_c                    18.5797(7) 
_cell_angle_alpha                 90.00 
_cell_angle_beta                  119.962(3) 
_cell_angle_gamma                 90.00 
_cell_volume                      3173.87(22) 
_cell_formula_units_Z             12 
_cell_measurement_temperature     100(2) 
_cell_measurement_reflns_used    11590
_cell_measurement_theta_min      1.92
_cell_measurement_theta_max      29.68
 
_exptl_crystal_description       'hexagonal rod'
_exptl_crystal_colour            'deep red'
_exptl_crystal_size_max          0.079
_exptl_crystal_size_mid          0.071
_exptl_crystal_size_min          0.059
_exptl_crystal_density_meas       ? 
_exptl_crystal_density_diffrn     3.513 
_exptl_crystal_density_method     'not measured' 
_exptl_crystal_F_000              2904 
_exptl_absorpt_coefficient_mu     11.106 
_exptl_absorpt_correction_type   integration
_exptl_absorpt_correction_T_min  0.2166
_exptl_absorpt_correction_T_max  0.3542
_exptl_absorpt_process_details    'X-SHAPE' 
 
_exptl_special_details 
; 
 ? 
; 
 
_diffrn_ambient_temperature       100(2) 
_diffrn_measurement_device         '2-circle goniometer'
_diffrn_measurement_device_type    'STOE IPDS 2'
_diffrn_detector                   'image plate (34 cm diameter)'
_diffrn_detector_type              'STOE'
_diffrn_detector_area_resol_mean   6.67
_diffrn_source           'sealed X-ray tube, 12 x 0.4 mm long-fine focus'
_diffrn_source_voltage             40
_diffrn_source_current             30
_diffrn_source_power               1.20
_diffrn_radiation_type             'Mo K\a'
_diffrn_radiation_wavelength       0.71073
_diffrn_radiation_monochromator    'plane graphite'
_diffrn_radiation_polarisn_norm    0
_diffrn_radiation_collimation      '0.5 mm diameter, monocapillary'
_diffrn_measurement_method         'rotation method'
_diffrn_measurement_details
; 180 frames, detector distance = 100 mm
;
_diffrn_reflns_number             20359 
_diffrn_reflns_av_R_equivalents   0.0481 
_diffrn_reflns_av_sigmaI/netI     0.0492 
_diffrn_reflns_limit_h_min        -11 
_diffrn_reflns_limit_h_max        10 
_diffrn_reflns_limit_k_min        -25 
_diffrn_reflns_limit_k_max        25 
_diffrn_reflns_limit_l_min        -20 
_diffrn_reflns_limit_l_max        22 
_diffrn_reflns_theta_min          1.59 
_diffrn_reflns_theta_max          24.99 
_reflns_number_total              5320 
_reflns_number_gt                 3963 
_reflns_threshold_expression      >2sigma(I) 
 
_computing_data_collection       'STOE X-AREA'
_computing_cell_refinement       'STOE X-AREA'
_computing_data_reduction        'STOE X-RED'
_computing_structure_solution     'SHELXS-97 (Sheldrick, 2008)' 
_computing_structure_refinement   'SHELXL-97 (Sheldrick, 2008)' 
_computing_molecular_graphics     ? 
_computing_publication_material   ? 
 
_refine_special_details 
; 
 Refinement of F^2^ against ALL reflections.  The weighted R-factor wR and 
 goodness of fit S are based on F^2^, conventional R-factors R are based 
 on F, with F set to zero for negative F^2^. The threshold expression of 
 F^2^ > 2sigma(F^2^) is used only for calculating R-factors(gt) etc. and is 
 not relevant to the choice of reflections for refinement.  R-factors based 
 on F^2^ are statistically about twice as large as those based on F, and R- 
 factors based on ALL data will be even larger. 
; 
 
_refine_ls_structure_factor_coef  Fsqd  
_refine_ls_matrix_type            full 
_refine_ls_weighting_scheme       calc  
_refine_ls_weighting_details 
 'calc w=1/[\s^2^(Fo^2^)+(0.0302P)^2^+11.0015P] where P=(Fo^2^+2Fc^2^)/3' 
_atom_sites_solution_primary      direct 
_atom_sites_solution_secondary    difmap 
_atom_sites_solution_hydrogens    geom 
_refine_ls_hydrogen_treatment     mixed 
_refine_ls_extinction_method      none 
_refine_ls_extinction_coef        ? 
_refine_ls_number_reflns          5320 
_refine_ls_number_parameters      164 
_refine_ls_number_restraints      0 
_refine_ls_R_factor_all           0.0818 
_refine_ls_R_factor_gt            0.0542 
_refine_ls_wR_factor_ref          0.0890 
_refine_ls_wR_factor_gt           0.0825 
_refine_ls_goodness_of_fit_ref    1.102 
_refine_ls_restrained_S_all       1.102 
_refine_ls_shift/su_max           0.001 
_refine_ls_shift/su_mean          0.000 
 
loop_ 
 _atom_site_label 
 _atom_site_type_symbol 
 _atom_site_fract_x 
 _atom_site_fract_y 
 _atom_site_fract_z 
 _atom_site_U_iso_or_equiv 
 _atom_site_adp_type 
 _atom_site_occupancy 
 _atom_site_symmetry_multiplicity 
 _atom_site_calc_flag 
 _atom_site_refinement_flags 
 _atom_site_disorder_assembly 
 _atom_site_disorder_group 
Sn1 Sn -0.32989(12) 1.34197(4) -0.08016(6) 0.0202(2) Uani 1 1 d . . . 
Sn2 Sn 0.00290(13) 1.00434(5) 0.24883(7) 0.02017(19) Uani 1 1 d . . . 
Sn3 Sn 0.33975(12) 0.84534(4) 0.08762(7) 0.0220(2) Uani 1 1 d . . . 
I1 I 0.45662(10) 0.75729(5) 0.23513(5) 0.0243(2) Uani 1 1 d . . . 
I2 I -0.03362(10) 1.25499(5) 0.00712(5) 0.0249(2) Uani 1 1 d . . . 
I3 I 0.51462(10) 0.75653(5) 0.02324(6) 0.0252(2) Uani 1 1 d . . . 
I4 I 0.65432(13) 0.92416(5) 0.18250(7) 0.0314(2) Uani 1 1 d . . . 
I5 I -0.13258(12) 1.41547(5) -0.14883(7) 0.0339(2) Uani 1 1 d . . . 
I6 I 0.30257(12) 1.08886(5) 0.30739(6) 0.0310(2) Uani 1 1 d . . . 
I7 I -0.21499(12) 1.42087(5) 0.07733(7) 0.0351(3) Uani 1 1 d . . . 
I8 I -0.19179(11) 1.08481(5) 0.09586(7) 0.0319(2) Uani 1 1 d . . . 
I9 I 0.12065(12) 0.92074(5) 0.15254(7) 0.0362(3) Uani 1 1 d . . . 
C1 C -0.671(2) 1.4159(9) 0.0833(11) 0.0369(17) Uani 1 1 d . . . 
C2 C -0.0016(18) 1.2537(11) 0.2497(10) 0.0433(18) Uani 1 1 d . . . 
C3 C -0.3327(19) 0.9146(9) -0.0839(11) 0.0360(17) Uani 1 1 d . . . 
N1 N -0.8116(15) 1.4177(7) 0.0833(9) 0.0369(17) Uani 1 1 d . . . 
H1A H -0.8122 1.4253 0.1286 0.044 Uiso 1 1 calc R . . 
H1B H -0.9034 1.4113 0.0379 0.044 Uiso 1 1 calc R . . 
N2 N -0.6732(16) 1.4062(7) 0.0125(9) 0.0369(17) Uani 1 1 d . . . 
H2A H -0.7661 1.4012 -0.0327 0.044 Uiso 1 1 calc R . . 
H2B H -0.5816 1.4049 0.0117 0.044 Uiso 1 1 calc R . . 
N3 N -0.5302(15) 1.4256(6) 0.1519(9) 0.0369(17) Uani 1 1 d . . . 
H3A H -0.5295 1.4332 0.1976 0.044 Uiso 1 1 calc R . . 
H3B H -0.4384 1.4243 0.1513 0.044 Uiso 1 1 calc R . . 
N4 N -0.1532(14) 1.2543(8) 0.1896(8) 0.0433(18) Uani 1 1 d . . . 
H4A H -0.2332 1.2525 0.2002 0.052 Uiso 1 1 calc R . . 
H4B H -0.1743 1.2565 0.1391 0.052 Uiso 1 1 calc R . . 
N5 N 0.0283(15) 1.2503(8) 0.3265(8) 0.0433(18) Uani 1 1 d . . . 
H5A H -0.0527 1.2484 0.3363 0.052 Uiso 1 1 calc R . . 
H5B H 0.1289 1.2498 0.3670 0.052 Uiso 1 1 calc R . . 
N6 N 0.1222(15) 1.2626(7) 0.2350(8) 0.0433(18) Uani 1 1 d . . . 
H6A H 0.1019 1.2689 0.1851 0.052 Uiso 1 1 calc R . . 
H6B H 0.2229 1.2622 0.2755 0.052 Uiso 1 1 calc R . . 
N7 N -0.3454(16) 0.9231(6) -0.0179(9) 0.0360(17) Uani 1 1 d . . . 
H7A H -0.2575 0.9263 0.0301 0.043 Uiso 1 1 calc R . . 
H7B H -0.4417 0.9256 -0.0222 0.043 Uiso 1 1 calc R . . 
N8 N -0.1854(15) 0.9109(7) -0.0770(9) 0.0360(17) Uani 1 1 d . . . 
H8A H -0.0976 0.9141 -0.0290 0.043 Uiso 1 1 calc R . . 
H8B H -0.1767 0.9052 -0.1205 0.043 Uiso 1 1 calc R . . 
N9 N -0.4673(15) 0.9072(7) -0.1568(8) 0.0360(17) Uani 1 1 d . . . 
H9A H -0.5634 0.9080 -0.1607 0.043 Uiso 1 1 calc R . . 
H9B H -0.4592 0.9015 -0.2004 0.043 Uiso 1 1 calc R . . 
 
loop_ 
 _atom_site_aniso_label 
 _atom_site_aniso_U_11 
 _atom_site_aniso_U_22 
 _atom_site_aniso_U_33 
 _atom_site_aniso_U_23 
 _atom_site_aniso_U_13 
 _atom_site_aniso_U_12 
Sn1 0.0211(5) 0.0204(5) 0.0181(6) 0.0009(4) 0.0091(5) 0.0010(4) 
Sn2 0.0187(4) 0.0252(4) 0.0159(5) 0.0007(3) 0.0081(4) -0.0007(3) 
Sn3 0.0231(5) 0.0196(5) 0.0210(6) 0.0006(4) 0.0094(5) 0.0003(4) 
I1 0.0231(4) 0.0320(5) 0.0178(5) 0.0045(4) 0.0103(4) 0.0031(4) 
I2 0.0184(4) 0.0352(5) 0.0182(5) 0.0017(4) 0.0070(4) 0.0024(4) 
I3 0.0213(4) 0.0353(5) 0.0201(5) -0.0002(4) 0.0112(4) 0.0029(4) 
I4 0.0367(5) 0.0362(5) 0.0234(6) -0.0064(4) 0.0165(5) -0.0143(4) 
I5 0.0271(5) 0.0381(6) 0.0271(7) 0.0111(5) 0.0066(5) -0.0067(4) 
I6 0.0327(5) 0.0384(5) 0.0241(6) -0.0075(4) 0.0159(5) -0.0147(4) 
I7 0.0307(5) 0.0418(6) 0.0394(7) -0.0187(5) 0.0225(5) -0.0104(4) 
I8 0.0236(5) 0.0406(6) 0.0316(7) 0.0172(5) 0.0140(5) 0.0085(4) 
I9 0.0271(5) 0.0423(6) 0.0292(7) -0.0118(5) 0.0065(5) 0.0108(4) 
C1 0.031(3) 0.057(5) 0.024(5) -0.010(3) 0.015(3) -0.007(3) 
C2 0.029(3) 0.078(5) 0.024(4) 0.002(4) 0.014(3) -0.008(4) 
C3 0.025(3) 0.059(5) 0.023(4) -0.003(3) 0.011(3) 0.000(3) 
N1 0.031(3) 0.057(5) 0.024(5) -0.010(3) 0.015(3) -0.007(3) 
N2 0.031(3) 0.057(5) 0.024(5) -0.010(3) 0.015(3) -0.007(3) 
N3 0.031(3) 0.057(5) 0.024(5) -0.010(3) 0.015(3) -0.007(3) 
N4 0.029(3) 0.078(5) 0.024(4) 0.002(4) 0.014(3) -0.008(4) 
N5 0.029(3) 0.078(5) 0.024(4) 0.002(4) 0.014(3) -0.008(4) 
N6 0.029(3) 0.078(5) 0.024(4) 0.002(4) 0.014(3) -0.008(4) 
N7 0.025(3) 0.059(5) 0.023(4) -0.003(3) 0.011(3) 0.000(3) 
N8 0.025(3) 0.059(5) 0.023(4) -0.003(3) 0.011(3) 0.000(3) 
N9 0.025(3) 0.059(5) 0.023(4) -0.003(3) 0.011(3) 0.000(3) 
 
_geom_special_details 
; 
 All esds (except the esd in the dihedral angle between two l.s. planes) 
 are estimated using the full covariance matrix.  The cell esds are taken 
 into account individually in the estimation of esds in distances, angles 
 and torsion angles; correlations between esds in cell parameters are only 
 used when they are defined by crystal symmetry.  An approximate (isotropic) 
 treatment of cell esds is used for estimating esds involving l.s. planes. 
; 
 
loop_ 
 _geom_bond_atom_site_label_1 
 _geom_bond_atom_site_label_2 
 _geom_bond_distance 
 _geom_bond_site_symmetry_2 
 _geom_bond_publ_flag 
Sn1 I2 3.0268(13) . ? 
Sn1 I7 3.0620(14) . ? 
Sn1 I5 3.1247(13) . ? 
Sn1 I3 3.2008(12) 3_575 ? 
Sn2 I8 3.0207(15) . ? 
Sn2 I6 3.0226(13) . ? 
Sn2 I9 3.0818(14) . ? 
Sn3 I1 3.0329(13) . ? 
Sn3 I4 3.0513(13) . ? 
Sn3 I3 3.0926(12) . ? 
I3 Sn1 3.2008(12) 3_575 ? 
C1 N1 1.307(19) . ? 
C1 N3 1.31(2) . ? 
C1 N2 1.32(2) . ? 
C2 N4 1.289(19) . ? 
C2 N5 1.312(19) . ? 
C2 N6 1.323(17) . ? 
C3 N7 1.30(2) . ? 
C3 N8 1.314(18) . ? 
C3 N9 1.32(2) . ? 
 
loop_ 
 _geom_angle_atom_site_label_1 
 _geom_angle_atom_site_label_2 
 _geom_angle_atom_site_label_3 
 _geom_angle 
 _geom_angle_site_symmetry_1 
 _geom_angle_site_symmetry_3 
 _geom_angle_publ_flag 
I2 Sn1 I7 91.76(4) . . ? 
I2 Sn1 I5 87.63(3) . . ? 
I7 Sn1 I5 97.01(4) . . ? 
I2 Sn1 I3 85.50(3) . 3_575 ? 
I7 Sn1 I3 91.67(4) . 3_575 ? 
I5 Sn1 I3 169.09(4) . 3_575 ? 
I8 Sn2 I6 90.92(4) . . ? 
I8 Sn2 I9 89.90(4) . . ? 
I6 Sn2 I9 91.04(4) . . ? 
I1 Sn3 I4 90.41(4) . . ? 
I1 Sn3 I3 87.40(3) . . ? 
I4 Sn3 I3 91.06(3) . . ? 
Sn3 I3 Sn1 78.23(3) . 3_575 ? 
N1 C1 N3 120.7(14) . . ? 
N1 C1 N2 119.1(15) . . ? 
N3 C1 N2 120.2(13) . . ? 
N4 C2 N5 119.2(12) . . ? 
N4 C2 N6 120.6(13) . . ? 
N5 C2 N6 119.9(14) . . ? 
N7 C3 N8 119.8(16) . . ? 
N7 C3 N9 119.9(13) . . ? 
N8 C3 N9 120.3(15) . . ? 
 
_diffrn_measured_fraction_theta_max    0.950 
_diffrn_reflns_theta_full              24.99 
_diffrn_measured_fraction_theta_full   0.950 
_refine_diff_density_max    1.591 
_refine_diff_density_min   -1.350 
_refine_diff_density_rms    0.213 

#=======================================================================
data_3a.GASnI3-293K
#=======================================================================

 
_audit_creation_method            SHELXL-97 
_chemical_name_systematic 
; 
 ? 
; 
_chemical_name_common             'Guanidinium Tin Iodide'
_chemical_melting_point           ? 
_chemical_formula_moiety          'C(NH2)3SnI3' 
_chemical_formula_sum 
 'C H6 I3 N3 Sn' 
_chemical_formula_weight          559.48 
 
loop_ 
 _atom_type_symbol 
 _atom_type_description 
 _atom_type_scat_dispersion_real 
 _atom_type_scat_dispersion_imag 
 _atom_type_scat_source 
 'C'  'C'   0.0033   0.0016 
 'International Tables Vol C Tables 4.2.6.8 and 6.1.1.4' 
 'H'  'H'   0.0000   0.0000 
 'International Tables Vol C Tables 4.2.6.8 and 6.1.1.4' 
 'N'  'N'   0.0061   0.0033 
 'International Tables Vol C Tables 4.2.6.8 and 6.1.1.4' 
 'Sn'  'Sn'  -0.6537   1.4246 
 'International Tables Vol C Tables 4.2.6.8 and 6.1.1.4' 
 'I'  'I'  -0.4742   1.8119 
 'International Tables Vol C Tables 4.2.6.8 and 6.1.1.4' 
 
_symmetry_cell_setting           hexagonal
_symmetry_space_group_name_H-M   'P 63/m'
_symmetry_space_group_name_Hall  '-P 6c'
_symmetry_Int_Tables_number      176 
 
loop_ 
 _symmetry_equiv_pos_as_xyz 
 'x, y, z' 
 '-y, x-y, z' 
 '-x+y, -x, z' 
 '-x, -y, z+1/2' 
 'y, -x+y, z+1/2' 
 'x-y, x, z+1/2' 
 '-x, -y, -z' 
 'y, -x+y, -z' 
 'x-y, x, -z' 
 'x, y, -z-1/2' 
 '-y, x-y, -z-1/2' 
 '-x+y, -x, -z-1/2' 
 
_cell_length_a                    9.3309(3) 
_cell_length_b                    9.3309(3) 
_cell_length_c                    21.5460(9) 
_cell_angle_alpha                 90.00 
_cell_angle_beta                  90.00 
_cell_angle_gamma                 120.00 
_cell_volume                      1624.59(10) 
_cell_formula_units_Z             6 
_cell_measurement_temperature     293(2) 
_cell_measurement_reflns_used    16832
_cell_measurement_theta_min      1.89
_cell_measurement_theta_max      29.48
 
_exptl_crystal_description       'hexagonal rod'
_exptl_crystal_colour            'deep red'
_exptl_crystal_size_max          0.123
_exptl_crystal_size_mid          0.114
_exptl_crystal_size_min          0.097
_exptl_crystal_density_meas       ? 
_exptl_crystal_density_diffrn     3.431 
_exptl_crystal_density_method     'not measured' 
_exptl_crystal_F_000              1452 
_exptl_absorpt_coefficient_mu     10.849 
_exptl_absorpt_correction_type   integration
_exptl_absorpt_correction_T_min  0.1257
_exptl_absorpt_correction_T_max  0.2485 
_exptl_absorpt_process_details    'X-SHAPE' 
 
_exptl_special_details 
; 
 ? 
; 
 
_diffrn_ambient_temperature       293(2) 
_diffrn_measurement_device         '2-circle goniometer'
_diffrn_measurement_device_type    'STOE IPDS 2T'
_diffrn_detector                   'image plate (34 cm diameter)'
_diffrn_detector_type              'STOE'
_diffrn_detector_area_resol_mean   6.67
_diffrn_source           'sealed X-ray tube, 12 x 0.4 mm long-fine focus'
_diffrn_source_voltage             40
_diffrn_source_current             30
_diffrn_source_power               1.20
_diffrn_radiation_type             'Mo K\a'
_diffrn_radiation_wavelength       0.71073
_diffrn_radiation_monochromator    'plane graphite'
_diffrn_radiation_polarisn_norm    0
_diffrn_radiation_collimation      '0.5 mm diameter, monocapillary'
_diffrn_measurement_method         'rotation method'
_diffrn_measurement_details
; 180 frames, detector distance = 100 mm
;
_diffrn_reflns_number             14649 
_diffrn_reflns_av_R_equivalents   0.0896 
_diffrn_reflns_av_sigmaI/netI     0.0322 
_diffrn_reflns_limit_h_min        -12 
_diffrn_reflns_limit_h_max        12 
_diffrn_reflns_limit_k_min        -12 
_diffrn_reflns_limit_k_max        12 
_diffrn_reflns_limit_l_min        -29 
_diffrn_reflns_limit_l_max        25 
_diffrn_reflns_theta_min          1.89 
_diffrn_reflns_theta_max          29.15 
_reflns_number_total              1494 
_reflns_number_gt                 1386 
_reflns_threshold_expression      >2sigma(I) 
 
_computing_data_collection       'STOE X-AREA'
_computing_cell_refinement       'STOE X-AREA'
_computing_data_reduction        'STOE X-RED' 
_computing_structure_solution     'SHELXS-97 (Sheldrick, 2008)' 
_computing_structure_refinement   'SHELXL-97 (Sheldrick, 2008)' 
_computing_molecular_graphics     ? 
_computing_publication_material   ? 
 
_refine_special_details 
; 
 Refinement of F^2^ against ALL reflections.  The weighted R-factor wR and 
 goodness of fit S are based on F^2^, conventional R-factors R are based 
 on F, with F set to zero for negative F^2^. The threshold expression of 
 F^2^ > 2sigma(F^2^) is used only for calculating R-factors(gt) etc. and is 
 not relevant to the choice of reflections for refinement.  R-factors based 
 on F^2^ are statistically about twice as large as those based on F, and R- 
 factors based on ALL data will be even larger. 
; 
 
_refine_ls_structure_factor_coef  Fsqd  
_refine_ls_matrix_type            full 
_refine_ls_weighting_scheme       calc  
_refine_ls_weighting_details 
 'calc w=1/[\s^2^(Fo^2^)+(0.0387P)^2^+8.7353P] where P=(Fo^2^+2Fc^2^)/3' 
_atom_sites_solution_primary      direct 
_atom_sites_solution_secondary    difmap 
_atom_sites_solution_hydrogens    geom 
_refine_ls_hydrogen_treatment     mixed 
_refine_ls_extinction_method      none 
_refine_ls_extinction_coef        ? 
_refine_ls_number_reflns          1494 
_refine_ls_number_parameters      42 
_refine_ls_number_restraints      0 
_refine_ls_R_factor_all           0.0511 
_refine_ls_R_factor_gt            0.0470 
_refine_ls_wR_factor_ref          0.1149 
_refine_ls_wR_factor_gt           0.1126 
_refine_ls_goodness_of_fit_ref    1.181 
_refine_ls_restrained_S_all       1.181 
_refine_ls_shift/su_max           0.000 
_refine_ls_shift/su_mean          0.000 
 
loop_ 
 _atom_site_label 
 _atom_site_type_symbol 
 _atom_site_fract_x 
 _atom_site_fract_y 
 _atom_site_fract_z 
 _atom_site_U_iso_or_equiv 
 _atom_site_adp_type 
 _atom_site_occupancy 
 _atom_site_symmetry_multiplicity 
 _atom_site_calc_flag 
 _atom_site_refinement_flags 
 _atom_site_disorder_assembly 
 _atom_site_disorder_group 
Sn1 Sn 0.3333 0.6667 0.15747(4) 0.0452(2) Uani 1 3 d S . . 
Sn2 Sn 1.0000 1.0000 0.0000 0.0423(3) Uani 1 6 d S . . 
I1 I 0.46420(11) 0.49751(11) 0.2500 0.0539(2) Uani 1 2 d S . . 
I2 I 0.67530(10) 0.80630(9) 0.08196(4) 0.0701(3) Uani 1 1 d . . . 
C1 C 0.6667 1.3333 0.0855(8) 0.052(3) Uani 1 3 d S . . 
C2 C 0.0000 0.0000 0.2500 0.048(4) Uani 1 6 d S . . 
N1 N 0.6608(17) 1.1945(15) 0.0852(7) 0.121(6) Uani 1 1 d . . . 
H1A H 0.7509 1.1905 0.0848 0.146 Uiso 1 1 calc R . . 
H1B H 0.5667 1.1044 0.0854 0.146 Uiso 1 1 calc R . . 
N2 N 0.155(2) 0.048(3) 0.2500 0.157(12) Uani 1 2 d S . . 
H2A H 0.1873 -0.0233 0.2500 0.189 Uiso 1 2 calc SR . . 
H2B H 0.2264 0.1523 0.2500 0.189 Uiso 1 2 calc SR . . 
 
loop_ 
 _atom_site_aniso_label 
 _atom_site_aniso_U_11 
 _atom_site_aniso_U_22 
 _atom_site_aniso_U_33 
 _atom_site_aniso_U_23 
 _atom_site_aniso_U_13 
 _atom_site_aniso_U_12 
Sn1 0.0476(3) 0.0476(3) 0.0406(4) 0.000 0.000 0.02378(16) 
Sn2 0.0378(4) 0.0378(4) 0.0513(7) 0.000 0.000 0.01890(18) 
I1 0.0567(5) 0.0508(4) 0.0649(5) 0.000 0.000 0.0348(4) 
I2 0.0722(4) 0.0584(4) 0.0841(5) 0.0181(3) 0.0338(4) 0.0359(3) 
C1 0.046(4) 0.046(4) 0.063(9) 0.000 0.000 0.023(2) 
C2 0.042(6) 0.042(6) 0.059(11) 0.000 0.000 0.021(3) 
N1 0.094(8) 0.065(6) 0.216(18) 0.025(9) 0.059(10) 0.048(7) 
N2 0.056(10) 0.088(14) 0.32(4) 0.000 0.000 0.033(10) 
 
_geom_special_details 
; 
 All esds (except the esd in the dihedral angle between two l.s. planes) 
 are estimated using the full covariance matrix.  The cell esds are taken 
 into account individually in the estimation of esds in distances, angles 
 and torsion angles; correlations between esds in cell parameters are only 
 used when they are defined by crystal symmetry.  An approximate (isotropic) 
 treatment of cell esds is used for estimating esds involving l.s. planes. 
; 
 
loop_ 
 _geom_bond_atom_site_label_1 
 _geom_bond_atom_site_label_2 
 _geom_bond_distance 
 _geom_bond_site_symmetry_2 
 _geom_bond_publ_flag 
Sn1 I1 3.1439(8) 3_565 ? 
Sn1 I1 3.1439(8) 2_665 ? 
Sn1 I1 3.1440(8) . ? 
Sn1 I2 3.2200(8) . ? 
Sn1 I2 3.2200(8) 2_665 ? 
Sn1 I2 3.2200(8) 3_565 ? 
Sn2 I2 3.1763(7) 9_655 ? 
Sn2 I2 3.1763(7) 3_675 ? 
Sn2 I2 3.1763(7) 8_565 ? 
Sn2 I2 3.1763(7) 2_765 ? 
Sn2 I2 3.1763(7) 7_775 ? 
Sn2 I2 3.1763(7) . ? 
I1 Sn1 3.1439(8) 10_556 ? 
C1 N1 1.269(11) . ? 
C1 N1 1.269(11) 2_775 ? 
C1 N1 1.269(11) 3_575 ? 
C2 N2 1.281(17) 3 ? 
C2 N2 1.281(17) 2 ? 
C2 N2 1.281(17) . ? 
 
loop_ 
 _geom_angle_atom_site_label_1 
 _geom_angle_atom_site_label_2 
 _geom_angle_atom_site_label_3 
 _geom_angle 
 _geom_angle_site_symmetry_1 
 _geom_angle_site_symmetry_3 
 _geom_angle_publ_flag 
I1 Sn1 I1 84.08(2) 3_565 2_665 ? 
I1 Sn1 I1 84.08(2) 3_565 . ? 
I1 Sn1 I1 84.08(2) 2_665 . ? 
I1 Sn1 I2 170.87(3) 3_565 . ? 
I1 Sn1 I2 90.31(2) 2_665 . ? 
I1 Sn1 I2 88.19(2) . . ? 
I1 Sn1 I2 90.31(2) 3_565 2_665 ? 
I1 Sn1 I2 88.19(2) 2_665 2_665 ? 
I1 Sn1 I2 170.87(3) . 2_665 ? 
I2 Sn1 I2 96.72(3) . 2_665 ? 
I1 Sn1 I2 88.19(2) 3_565 3_565 ? 
I1 Sn1 I2 170.87(3) 2_665 3_565 ? 
I1 Sn1 I2 90.31(2) . 3_565 ? 
I2 Sn1 I2 96.72(3) . 3_565 ? 
I2 Sn1 I2 96.72(3) 2_665 3_565 ? 
I2 Sn2 I2 180.00(2) 9_655 3_675 ? 
I2 Sn2 I2 92.08(2) 9_655 8_565 ? 
I2 Sn2 I2 87.92(2) 3_675 8_565 ? 
I2 Sn2 I2 87.92(2) 9_655 2_765 ? 
I2 Sn2 I2 92.08(2) 3_675 2_765 ? 
I2 Sn2 I2 180.00(2) 8_565 2_765 ? 
I2 Sn2 I2 92.08(2) 9_655 7_775 ? 
I2 Sn2 I2 87.92(2) 3_675 7_775 ? 
I2 Sn2 I2 92.08(2) 8_565 7_775 ? 
I2 Sn2 I2 87.92(2) 2_765 7_775 ? 
I2 Sn2 I2 87.92(2) 9_655 . ? 
I2 Sn2 I2 92.08(2) 3_675 . ? 
I2 Sn2 I2 87.92(2) 8_565 . ?
I2 Sn2 I2 92.08(2) 2_765 . ? 
I2 Sn2 I2 180.0 7_775 . ? 
Sn1 I1 Sn1 78.71(3) 10_556 . ? 
Sn2 I2 Sn1 168.95(3) . . ? 
N1 C1 N1 120.00(3) . 2_775 ? 
N1 C1 N1 120.00(2) . 3_575 ? 
N1 C1 N1 120.00(2) 2_775 3_575 ? 
N2 C2 N2 120.000(9) 3 2 ? 
N2 C2 N2 120.001(1) 3 . ? 
N2 C2 N2 119.999(4) 2 . ? 
 
_diffrn_measured_fraction_theta_max    0.995 
_diffrn_reflns_theta_full              29.15 
_diffrn_measured_fraction_theta_full   0.995 
_refine_diff_density_max    1.217 
_refine_diff_density_min   -1.819 
_refine_diff_density_rms    0.256 
